# Supplementary material for: Association between social activity frequency and overall survival in older people: results from the Chinese Longitudinal Healthy Longevity Survey (CLHLS)
Source: HighWire-hosted journal article supplement (doi:10.1136/jech-2022-219791), 2023-03-06
Supplement: jech-2022-219791supp006_data_supplement.pdf [file jech-2022-219791supp006_data_supplement.pdf]

Table S2. Distributions of variables with missing data

| Variable                 | Percentage with missing data (%) |
|--------------------------|----------------------------------|
| Sex                      | 0.00                             |
| Age                      | 0.00                             |
| Education                | 0.69                             |
| Marital status           | 0.06                             |
| Residence                | 0.00                             |
| Co-residence             | 0.08                             |
| Household income         | 0.54                             |
| Fresh fruit              | 0.03                             |
| Fresh vegetable          | 0.06                             |
| Current smoking          | 0.11                             |
| Current drinking         | 0.15                             |
| Current regular exercise | 0.26                             |
| Hypertension             | 0.42                             |
| Diabetes                 | 0.37                             |
| Heart disease            | 0.38                             |
| Cerebrovascular disease  | 0.34                             |
| Respiratory disease      | 0.34                             |
| Cancer                   | 0.50                             |
| Self-rated health        | 0.02                             |
