# Supplementary figures and images for: Association between social activity frequency and overall survival in older people: results from the Chinese Longitudinal Healthy Longevity Survey (CLHLS)
Source: HighWire-hosted journal article supplement (doi:10.1136/jech-2022-219791), 2023-03-06

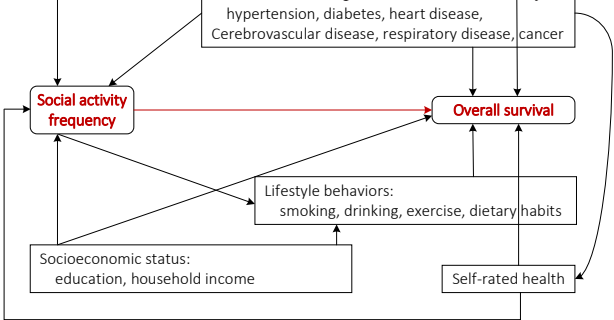

Supplement: jech-2022-219791supp001_data_supplement.pdf [file jech-2022-219791supp001_data_supplement.pdf]

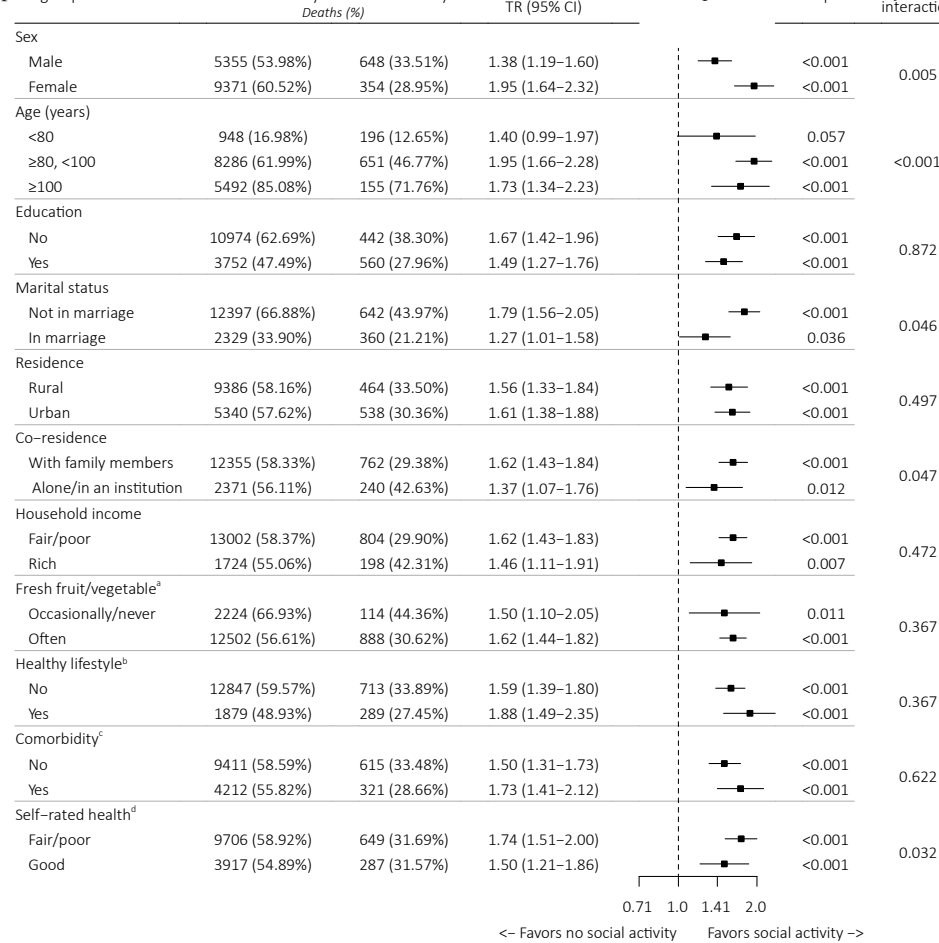

0.71 1.0 1.41 2.0  
 <- Favors no social activity Favors social activity ->

Supplement: jech-2022-219791supp003_data_supplement.pdf [file jech-2022-219791supp003_data_supplement.pdf]
